# Supplementary material
Source: publisher site journal article supplement (https://www.dovepress.com/article/155675)
Supplement: Supplementary file 1 [file get_supplementary_file.php]

## Supplementary material

### Inclusion and exclusion criteria for the review

The inclusion criteria for this review included English language articles containing any models predicting COPD in adults in the general population or in populations at high risk of development of COPD (smokers, asthmatics).

Studies with COPD risk prediction tools were included in this review if they met all of the following inclusion criteria:

- 1) the study's main aim was to develop a prediction tool for development of COPD in adults without prior diagnosis of COPD;
- 2) the prediction model was developed in adults in the general population, healthcare population or high risk populations (smokers, asthmatics);
- 3) the outcome of the prediction model was diagnosed COPD by: i) spirometry, ii) self-reported COPD, or related condition such as chronic bronchitis, emphysema, or chronic airways obstruction, not otherwise specified, or iii) COPD coded by an administrative coding system; (See Supplementary Table E7 for specific definitions)
- 4) development of a model based on: an *a-priori* set of predictors or predictors that were selected by statistical modelling or; updating an existing model; and
- 5) the study reported a formal prediction model or regression equation that has the ability to predict risk of COPD in other individuals.

We excluded studies that:

- 1) had a main objective to develop a predictive model for prognosis of COPD (i.e. models to predict exacerbations, hospital admissions or mortality in previously diagnosed COPD patients);

- 2) predicted undiagnosed COPD in a cross-sectional population;
- 3) used only one biomarker or one predictor in developing the model.
- 4) were reviews, letters, conference abstracts or expert opinion.

We assessed risk of bias and of applicability to our specific research question based on the CHARMS checklist for critical appraisal of prediction modelling studies.<sup>15</sup> For the risk of bias assessment, we utilised a similar approach to that used by Smit et al 2015<sup>16</sup> and developed similar assessment criteria for applicability concerns. Risk of bias was assessed in relation to five domains: participant selection, predictor assessment, outcome assessment, attrition and analysis. Applicability was assessed in relation to six domains: participant selection, predictor assessment, outcome assessment, analysis, results and interpretation (e-Table 3 and 4). The risk of bias or applicability was rated as high, medium or low based on criteria for each domain. If the study achieved all criteria in a specific domain, it was rated as low risk of bias or applicability concerns. If at least one of the criteria for low risk was not achieved, the study was rated as medium risk of bias or applicability concerns. If multiple criteria were not achieved or the criteria were missing or not reported, the study was rated as high risk of bias (e -Tables 3 and 4).

**Table S1 Search terms used in PubMed for this review**

| <b>Type of search terms</b>                  | <b>Search terms</b>                                                                                                                                 |
|----------------------------------------------|-----------------------------------------------------------------------------------------------------------------------------------------------------|
| Search terms related to outcomes of interest | COPD[Title] OR<br><br>COAD[Title] OR<br><br>"chronic obstructive airway disease"[Title] OR<br><br>"chronic obstructive pulmonary disease"[Title] OR |

|                                           |                                                                                                                                                                                                                                                                                                                                                                                                                                                                               |
|-------------------------------------------|-------------------------------------------------------------------------------------------------------------------------------------------------------------------------------------------------------------------------------------------------------------------------------------------------------------------------------------------------------------------------------------------------------------------------------------------------------------------------------|
|                                           | COPD[MeSH Terms]                                                                                                                                                                                                                                                                                                                                                                                                                                                              |
| Search terms related to prediction models | <p>“risk prediction model\$” OR</p> <p>“risk prediction” OR</p> <p>“predictive model\$” OR</p> <p>“predictive equation\$” OR</p> <p>“prediction model\$” OR</p> <p>“risk calculator\$” OR</p> <p>“prediction rule\$” OR</p> <p>“risk model\$” OR</p> <p>“Risk assessment model\$” OR</p> <p>“Assessment tool\$” OR</p> <p>“Prediction score\$” OR</p> <p>“Risk Score\$” OR</p> <p>roc curve OR</p> <p>c-statistic OR</p> <p>c statistic OR</p> <p>area under the curve OR</p> |

|  |                                                                                                                                                                                                                                                                                                                                                                                                                                   |
|--|-----------------------------------------------------------------------------------------------------------------------------------------------------------------------------------------------------------------------------------------------------------------------------------------------------------------------------------------------------------------------------------------------------------------------------------|
|  | <p>AUC OR</p> <p>“Prognostic model*” OR</p> <p>“Prediction tool\$” OR</p> <p>“Predictive tool\$” OR</p> <p>“Predictive accuracy\$” OR</p> <p>“Prognostic tool\$” OR</p> <p>“prognostic factors” OR</p> <p>“predictive value\$” OR</p> <p>“early prediction\$” OR</p> <p>“prognostic indicator\$” OR</p> <p>“risk prediction tool\$” OR</p> <p>“Receiver Operating Characteristic\$”</p> <p>“net reclassification improvement”</p> |
|--|-----------------------------------------------------------------------------------------------------------------------------------------------------------------------------------------------------------------------------------------------------------------------------------------------------------------------------------------------------------------------------------------------------------------------------------|

**Table S2 Search terms used in EMBASE for this review**

| <b>Number</b> | <b>Search term</b>                            |
|---------------|-----------------------------------------------|
| 1             | COPD.m_titl.                                  |
| 2             | COAD.m_titl.                                  |
| 3             | chronic obstructive airway disease.m_titl.    |
| 4             | chronic obstructive pulmonary disease.m_titl. |
| 5             | chronic obstructive lung disease/             |
| 6             | 1 or 2 or 3 or 4 or 5                         |
| 7             | risk prediction model\$.mp.                   |
| 8             | risk prediction.mp.                           |
| 9             | predictive model\$.mp.                        |
| 10            | predictive equation\$.mp.                     |
| 11            | prediction model\$.mp.                        |
| 12            | risk calculator\$.mp.                         |
| 13            | prediction rule\$.mp.                         |
| 14            | risk model\$.mp.                              |

|    |                             |
|----|-----------------------------|
| 15 | Risk assessment model\$.mp. |
| 16 | Assessment tool\$.mp.       |
| 17 | Prediction score\$.mp.      |
| 18 | Risk Score\$.mp.            |
| 19 | roc curve.mp.               |
| 20 | c-statistic.mp.             |
| 21 | c statistic.mp.             |
| 22 | area under the curve.mp.    |
| 23 | AUC.mp.                     |
| 24 | Prognostic model*.mp.       |
| 25 | Prediction tool\$.mp.       |
| 26 | Predictive tool\$.mp.       |
| 27 | Predictive accuracy\$.mp.   |
| 28 | Prognostic tool\$.mp.       |
| 29 | prognostic factors.mp.      |
| 30 | predictive value\$.mp.      |

|    |                                         |
|----|-----------------------------------------|
| 31 | early prediction\$.mp.                  |
| 32 | prognostic indicator\$.mp.              |
| 33 | risk prediction tool\$.mp.              |
| 34 | Receiver Operating Characteristic\$.mp. |
| 35 | net reclassification improvement.mp.    |



**Table S3 Criteria for scoring of risk of bias based on the CHARMS checklist**

| Potential bias               | Items to be considered for potential bias                                | Guo et al., 2015 <sup>21</sup> | Kotz et al., 2014 <sup>22</sup> | Himes et al., 2009 <sup>23</sup> | Higgins et al., 1982 <sup>24</sup> |
|------------------------------|--------------------------------------------------------------------------|--------------------------------|---------------------------------|----------------------------------|------------------------------------|
| <b>Participant selection</b> |                                                                          |                                |                                 |                                  |                                    |
|                              | <b>Low risk</b> of bias if:                                              |                                | ✓                               | ✓                                | ✓                                  |
|                              | - selection bias was unlikely                                            | ✘                              | ✓                               | ✓                                | ✓                                  |
|                              | - study avoided inappropriate inclusions or exclusions                   | ✓                              | ✓                               | ✓                                | ✓                                  |
|                              | - in- and exclusion criteria were adequately described                   | ✓                              | ✓                               | ✓                                | ✓                                  |
|                              | - participants were enrolled at a similar presentation of their disease  | ✓                              | ✓                               | ✓                                | ✓                                  |
|                              | <b>Moderate risk</b> of bias if:                                         |                                |                                 |                                  |                                    |
|                              | - not satisfying one of the above or                                     | ✓                              |                                 |                                  |                                    |
|                              | - no adequate description of recruitment of study sample                 |                                |                                 |                                  |                                    |
|                              | - no adequate description of the sample for key predictors               |                                |                                 |                                  |                                    |
|                              | <b>High risk</b> of bias if : - both items were not adequately described |                                |                                 |                                  |                                    |

|                             |                                                                                                        |   |   |   |   |
|-----------------------------|--------------------------------------------------------------------------------------------------------|---|---|---|---|
| <b>Predictor assessment</b> |                                                                                                        |   |   |   |   |
|                             | <b>Low risk of bias if:</b>                                                                            |   | ✓ |   | ✓ |
|                             | - predictor definitions were the same for all participants,                                            | ✓ | ✓ | ✓ | ✓ |
|                             | - predictor measurement was blinded to outcome data                                                    | ✓ | ✓ | ✓ | ✓ |
|                             | - all predictors were available at the time the model is intended to be used                           | ✓ | ✓ | ✓ | ✓ |
|                             | - predictors were measured with valid and reproducible methods such that misclassification was limited | ✗ | ✓ | ✓ |   |
|                             | - sufficient sample size to number of predictor                                                        | ✓ | ✓ | ✗ | ✓ |
|                             | - predictors were assessed in a similar way for all study participants                                 | ✓ | ✓ | ✓ | ✓ |
|                             | <b>Moderate risk of bias</b> if one of the criteria was not satisfied                                  | ✓ |   | ✓ |   |
|                             | <b>High risk of bias</b> if predictor assessment was not adequately described                          |   |   |   |   |
| <b>Outcome assessment</b>   |                                                                                                        |   |   |   |   |
|                             | <b>Low risk of bias if:</b>                                                                            |   | ✓ | ✓ | ✓ |
|                             | - outcome was pre-specified                                                                            | ✓ | ✓ | ✓ | ✓ |

|                  |                                                                                                                                                                                            |   |   |   |   |
|------------------|--------------------------------------------------------------------------------------------------------------------------------------------------------------------------------------------|---|---|---|---|
|                  | - measured with sufficient validity and reproducibility                                                                                                                                    | ✓ | ✓ | ✓ | ✓ |
|                  | - measured in a similar way for all study participants                                                                                                                                     | ✓ | ✓ | ✓ | ✓ |
|                  | - if the outcome was assessed independent from assessment of predictors.                                                                                                                   | ✗ | ✓ | ✓ | ✓ |
|                  | <b>Moderate risk of bias</b> if : - method for assessment of outcome was not adequately described                                                                                          | ✓ |   |   |   |
|                  | <b>High risk of bias</b> if method for assessment of outcome was not adequately described                                                                                                  |   |   |   |   |
| <b>Attrition</b> |                                                                                                                                                                                            |   |   |   |   |
|                  | <b>Low risk of bias</b> if                                                                                                                                                                 |   |   |   |   |
|                  | there was no loss-to-follow-up                                                                                                                                                             |   |   |   |   |
|                  | there were no important differences on key characteristics between included participants and those who were lost-to-follow-up or missing                                                   |   |   |   |   |
|                  | <b>Moderate risk of bias</b> if                                                                                                                                                            |   |   |   |   |
|                  | 1. - loss-to-follow-up was lower than 20% and there were no important differences on key characteristics between included participants and those who were lost-to-follow-up or missing OR: |   |   |   |   |
|                  | 2. - loss-to-follow-up was higher than 20% but missing data and loss-to-follow-up were imputed                                                                                             |   |   |   |   |

|                             |                                                                                                                                                        |   |   |   |   |
|-----------------------------|--------------------------------------------------------------------------------------------------------------------------------------------------------|---|---|---|---|
|                             | adequately or there were no important differences on key characteristics between included participants and those who were lost-to-follow-up or missing |   |   |   |   |
|                             | <b>High risk of bias if</b>                                                                                                                            | ✓ | ✓ | ✓ | ✓ |
|                             | loss-to-follow-up was higher than 20% and/or                                                                                                           | - | - | - | ✓ |
|                             | there were important differences on key characteristics between included participants and those who were lost-to-follow-up or missing                  | - | - | - | ✓ |
|                             | loss-to-follow-up was not described                                                                                                                    | ✗ | ✗ | ✗ | ✗ |
| <b>Analysis<sup>^</sup></b> |                                                                                                                                                        |   |   |   |   |
|                             | <b>Low risk of bias if</b><br><br>- relevant aspects of analysis were described allowing to judge the quality of the analysis to be adequate           |   |   |   |   |
|                             | - # outcome events per candidate predictor reasonable                                                                                                  | ✗ | ✓ | ✗ | ✓ |
|                             | - missing data handled appropriately or no differences                                                                                                 | ✗ | ✓ | ✗ | ✗ |
|                             | - predictors included independent of p-value                                                                                                           | ✓ | ✓ | ✓ | ✓ |
|                             | - over-fitting and optimism accounted for                                                                                                              | ✗ | ✗ | ✗ | ✗ |
|                             | - weights assigned according to regression coefficient                                                                                                 | ✓ | ✓ | ✓ | ✓ |

|  |                                                                                                                                                                                 |   |   |   |   |
|--|---------------------------------------------------------------------------------------------------------------------------------------------------------------------------------|---|---|---|---|
|  | - calibration and discrimination assessed                                                                                                                                       | x | ✓ | x | x |
|  | - recalibrated or described that it was not needed                                                                                                                              | x | ✓ | x | x |
|  | <b>Moderate risk of bias if:</b>                                                                                                                                                |   |   |   |   |
|  | -relevant aspects of analysis were described<br>allowing to judge the quality of the analysis to be<br>adequate and part or none of the model evaluation<br>items were reported | ✓ | ✓ | ✓ | ✓ |
|  | <b>High risk of bias if :</b> - not satisfying any of the<br>aspects under low risk of bias                                                                                     |   |   |   |   |

**Table S4 Criteria for scoring of Applicability or Generalisability to answer the specific research**

**question posed by this review based on the CHARMS checklist**

| <b>Applicability concerns</b> | <b>Items to be considered for applicability concerns</b>                | Guo et al., 2015 <sup>21</sup> | Kotz et al., 2014 <sup>22</sup> | Himes et al., 2009 <sup>23</sup> | Higgins et al., 1982 <sup>24</sup> |
|-------------------------------|-------------------------------------------------------------------------|--------------------------------|---------------------------------|----------------------------------|------------------------------------|
| <b>Participant selection</b>  | <b>Low risk of applicability concerns if:</b>                           |                                | ✓                               |                                  |                                    |
|                               | - selection bias was unlikely                                           | ✗                              | ✓                               |                                  |                                    |
|                               | - in- and ex-clusion criteria were adequately described and appropriate | ✗                              | ✓                               | ✓                                | ✓                                  |
|                               | - participant description adequate and population appropriate for RQ    | ✗                              | ✓                               | ✗                                | ✓                                  |
|                               | - study dates provided and relevant                                     | ✓                              | ✓                               | ✓                                | ✗                                  |
|                               | <b>Moderate risk of applicability concerns if:</b>                      | ✓                              |                                 | ✓                                | ✓                                  |
|                               | - not satisfying one of the above or                                    |                                |                                 |                                  |                                    |
|                               | - no adequate description of recruitment of study sample                |                                |                                 |                                  |                                    |
|                               | - no adequate description of the key predictors                         |                                |                                 |                                  |                                    |
|                               | <b>High risk of applicability concerns if:</b>                          |                                |                                 |                                  |                                    |
|                               | - no adequate description of study sample                               |                                |                                 |                                  |                                    |
| <b>Outcome</b>                | <b>Low risk of applicability concerns if:</b>                           | ✓                              | ✓                               | ✓                                | ✗                                  |

|                  |                                                                                                                                                   |   |   |   |   |
|------------------|---------------------------------------------------------------------------------------------------------------------------------------------------|---|---|---|---|
|                  | - outcome definition appropriate and measured with sufficient validity and reproducibility appropriate for the RQ                                 |   |   |   |   |
|                  | - measured in a similar way for all study participants                                                                                            |   |   |   | ✓ |
|                  | - if the outcome was assessed independent from assessment of predictors.                                                                          |   |   |   | ✓ |
|                  | <b>Moderate risk of applicability concerns if:</b><br><br>- one of the criteria was not satisfied                                                 |   |   |   | ✓ |
|                  | <b>High risk of applicability concerns if:</b><br><br>- not satisfying any of the aspects under low risk of bias                                  |   |   |   |   |
| <b>Predictor</b> | <b>Low risk of applicability concerns if:</b><br><br>- predictor definition appropriate and measured with sufficient validity and reproducibility | ✘ | ✓ | ✓ | ✓ |
|                  | - measured in a similar way for all study participants                                                                                            | ✓ | ✓ | ✓ | ✓ |
|                  | - measured at an appropriate time (e.g., at patient presentation, at diagnosis, at treatment initiation)                                          | ✓ | ✓ | ✓ | ✓ |
|                  | <b>Moderate risk of applicability concerns if:</b><br><br>- one of the criteria was not satisfied                                                 | ✓ |   |   |   |
|                  | <b>High risk of applicability concerns if:</b>                                                                                                    |   |   |   |   |

|                 |                                                                                                                                                                                                                                                                                                           |   |   |   |   |
|-----------------|-----------------------------------------------------------------------------------------------------------------------------------------------------------------------------------------------------------------------------------------------------------------------------------------------------------|---|---|---|---|
|                 | - not satisfying any of the aspects under low risk of bias                                                                                                                                                                                                                                                |   |   |   |   |
| <b>Analysis</b> | <b>Low risk of applicability concerns if:</b><br><br>- shrinkage of predictor weights or regression to improve applicability and avoid over-fitting and optimism                                                                                                                                          | x | x | x | x |
|                 | - calibration and discrimination assessed                                                                                                                                                                                                                                                                 | x | ✓ | x | x |
|                 | - recalibrated or described that it was not needed                                                                                                                                                                                                                                                        | x | x | x | x |
|                 | <b>Moderate risk of applicability concerns if:</b><br><br>-relevant aspects of analysis were described allowing the quality of the analysis to be judged as adequate and part or none of the model evaluation items were reported                                                                         |   | ✓ |   |   |
|                 | <b>High risk of applicability concerns if:</b><br><br>- not satisfying any of the aspects under low risk of bias                                                                                                                                                                                          | ✓ |   | ✓ | ✓ |
| <b>Results</b>  | <b>Low risk of applicability concerns if:</b><br><br>-Final and other multivariable models (e.g., basic, extended, simplified) presented, including predictor weights or regression coefficients, intercept, baseline survival, model performance measures (with standard errors or confidence intervals) | ✓ | ✓ |   | ✓ |



|                                      |                                                                                                                                                                 |   |   |   |   |
|--------------------------------------|-----------------------------------------------------------------------------------------------------------------------------------------------------------------|---|---|---|---|
|                                      | - Any alternative presentation of the final prediction models, e.g., sum score, nomogram, score chart, predictions for specific risk subgroups with performance | ✓ | ✓ | ✗ | ✓ |
|                                      | <b>Moderate risk of applicability concerns if:</b><br><br>- one of the criteria was not satisfied                                                               |   |   | ✓ |   |
|                                      | <b>High risk of applicability concerns if:</b><br><br>- not satisfying any of the aspects under low risk of bias                                                |   |   |   |   |
| <b>Interpretation and Discussion</b> | <b>Low risk of applicability concerns if:</b>                                                                                                                   |   | ✓ |   |   |
|                                      | -Interpretation of presented models (confirmatory, i.e., model useful for practice versus exploratory, i.e., more research needed)                              | ✗ | ✓ | ✓ | ✓ |
|                                      | -Comparison with other studies, discussion of generalizability, strengths and limitations.                                                                      | ✓ | ✓ | ✗ | ✗ |
|                                      | <b>Moderate risk of applicability concerns if:</b><br><br>- one of the criteria was not satisfied                                                               | ✓ |   | ✓ | ✓ |
|                                      | <b>High risk of applicability concerns if:</b><br><br>- not satisfying any of the aspects under low risk of bias                                                |   |   |   |   |

**Table S5 Definitions of predictors included in the presented final prediction models**

| <b>Ref</b>                      | <b>Age</b>                                          | <b>Sex</b>                                 | <b>Smoking</b>                                                                                                                                         | <b>Asthma</b>                                                                    |  | <b>Race</b> |  | <b>SES</b>                                                                  | <b>Other</b>                                                                                                                                                    |
|---------------------------------|-----------------------------------------------------|--------------------------------------------|--------------------------------------------------------------------------------------------------------------------------------------------------------|----------------------------------------------------------------------------------|--|-------------|--|-----------------------------------------------------------------------------|-----------------------------------------------------------------------------------------------------------------------------------------------------------------|
| Guo et al., 2015 <sup>21</sup>  | –                                                   | Male and female                            | Smoking history (presence of smoking history = 1, no smoking history = 0)                                                                              | –                                                                                |  | –           |  | –                                                                           | Respiratory infection in early life; low birth weight (<2,500 g) and six genetic variables (rs2070600, rs10947233, rs10947233, rs1800629, rs2241712 and rs1205) |
| Kotz et al., 2014 <sup>22</sup> | Categorised into 35–39, 40–44, 45–49, 50–54, 55–59, | Developed two models for males and females | Ever-smokers (patients recorded as ‘smoker’ or ‘ex-smoker’ at any time) and never-smokers (patients recorded as ‘non-smoker’ at any time and no coding | Asthma diagnosis (Identified as a risk factor if recorded prior to the patient’s |  | –           |  | Measured using the Carstairs Index of Deprivation (coded 1 = least deprived | –                                                                                                                                                               |

|                                  |                                                     |                 |                                                                                                                |                             |  |                                            |  |                       |                                                                                                                                                                                                                                |
|----------------------------------|-----------------------------------------------------|-----------------|----------------------------------------------------------------------------------------------------------------|-----------------------------|--|--------------------------------------------|--|-----------------------|--------------------------------------------------------------------------------------------------------------------------------------------------------------------------------------------------------------------------------|
|                                  | 60–64 and 65+ years                                 | separately      | as ‘smoker’ or ‘ex-smoker’ at any other time in electronic medical database).                                  | entry date into the cohort) |  |                                            |  | to 5 = most deprived) |                                                                                                                                                                                                                                |
| Himes et al., 2009 <sup>23</sup> | Categorised into 18–44, 45–64, 65–74, and 75+ years | Male and female | Smoking history (“Negative” if the smoking status was determined to be “never smoker” or “Positive” otherwise) | –                           |  | “White,” “Black,” “Hispanic,” and “Asian.” |  | –                     | Eight comorbidities: Acute upper respiratory infections; acute bronchitis and bronchiolitis; pneumonia, organism unspecified; shortness of breath; heart failure; respiratory distress or insufficiency; and diabetes mellitus |

|                                      |                                                     |                                                       |                                                                                                                    |   |  |   |  |   |                                     |
|--------------------------------------|-----------------------------------------------------|-------------------------------------------------------|--------------------------------------------------------------------------------------------------------------------|---|--|---|--|---|-------------------------------------|
| Higgins et al., 1982 <sup>24</sup> ^ | Age in years 20, 25, 30, 35, 40, 45, 50, 55, 60, 65 | Developed two models for males and females separately | Cigarettes/Day 0, 4, 9, 13, 18, 22, 27, 31, 35<br><br>Change in Cigarettes/Day -37, -28, -19, -9, 0, 9, 19, 28, 37 | - |  | - |  | - | %FEV1 (only in females) and %Vmax50 |
|--------------------------------------|-----------------------------------------------------|-------------------------------------------------------|--------------------------------------------------------------------------------------------------------------------|---|--|---|--|---|-------------------------------------|

^Definitions given for the predictors included in best predictive models for males and females

**Table S6 Prediction models presentation format**

| <b>Ref</b>                         | <b>Prediction model as presented in paper</b>                                                                                                                                                                                                                                                                                                                                                                                                                                                                        |       |              |                |
|------------------------------------|----------------------------------------------------------------------------------------------------------------------------------------------------------------------------------------------------------------------------------------------------------------------------------------------------------------------------------------------------------------------------------------------------------------------------------------------------------------------------------------------------------------------|-------|--------------|----------------|
| Guo et al.,<br>2015 <sup>21</sup>  | <p data-bbox="394 406 2101 523">COPD = 1/[1 + exp (-2.4933-1.2197 gender + 1.1842 respiratory infection in early life + 2.4350 low birth weight + 1.8524 smoking - 1.1978 rs2070600 + 2.0270 rs10947233 + 1.1913 rs10947233 + 0.6468 rs1800629 + 0.5272 rs2241712 + 0.4024 rs1205)]</p> <p data-bbox="394 699 2085 799">For example, if the value calculated using the formula is &gt;0.5 for an individual, it can be speculated that the patient is more likely to develop COPD prior to becoming symptomatic.</p> |       |              |                |
| Kotz et al.,<br>2014 <sup>22</sup> | Age category                                                                                                                                                                                                                                                                                                                                                                                                                                                                                                         |       | <b>Males</b> | <b>Females</b> |
|                                    |                                                                                                                                                                                                                                                                                                                                                                                                                                                                                                                      | 35-39 | 0.0000       | 0.0000         |
|                                    |                                                                                                                                                                                                                                                                                                                                                                                                                                                                                                                      | 40-44 | 0.7226       | 0.7195         |
|                                    |                                                                                                                                                                                                                                                                                                                                                                                                                                                                                                                      | 45-49 | 1.3540       | 1.3113         |
|                                    |                                                                                                                                                                                                                                                                                                                                                                                                                                                                                                                      | 50-54 | 1.7945       | 1.7030         |
|                                    |                                                                                                                                                                                                                                                                                                                                                                                                                                                                                                                      | 55-59 | 2.2681       | 2.0982         |
|                                    |                                                                                                                                                                                                                                                                                                                                                                                                                                                                                                                      | 60-64 | 2.6401       | 2.3529         |

|                                     |                                             |        |        |
|-------------------------------------|---------------------------------------------|--------|--------|
|                                     | 65+                                         | 3.4623 | 3.2485 |
| Ever smoker                         | Ever smoker                                 | 1.9057 | 2.2623 |
|                                     | Never smoker                                | 0.0000 | 0.0000 |
| Level of deprivation<br>(Carstairs) | 1 <sup>st</sup> quintile (least deprived)   | 0.0000 | 0.0000 |
|                                     | 2 <sup>nd</sup> quintile                    | 0.3073 | 0.2233 |
|                                     | 3 <sup>rd</sup> quintile                    | 0.4686 | 0.4989 |
|                                     | 4 <sup>th</sup> quintile                    | 0.6470 | 0.6666 |
|                                     | 5 <sup>th</sup> quintile (most<br>deprived) | 0.9262 | 0.9485 |
| History of asthma                   | yes                                         | 1.2148 | 1.0250 |
|                                     | no                                          | 0.0000 | 0.0000 |
|                                     | <b>Minimum PI* score:</b>                   | 0.0000 | 0.0000 |

Maximum PI\* score: 7.5090 7.4843

PI = prognostic index

Himes et al., 2009<sup>23</sup>

Predictive network of Chronic Obstructive Pulmonary Disease (COPD).

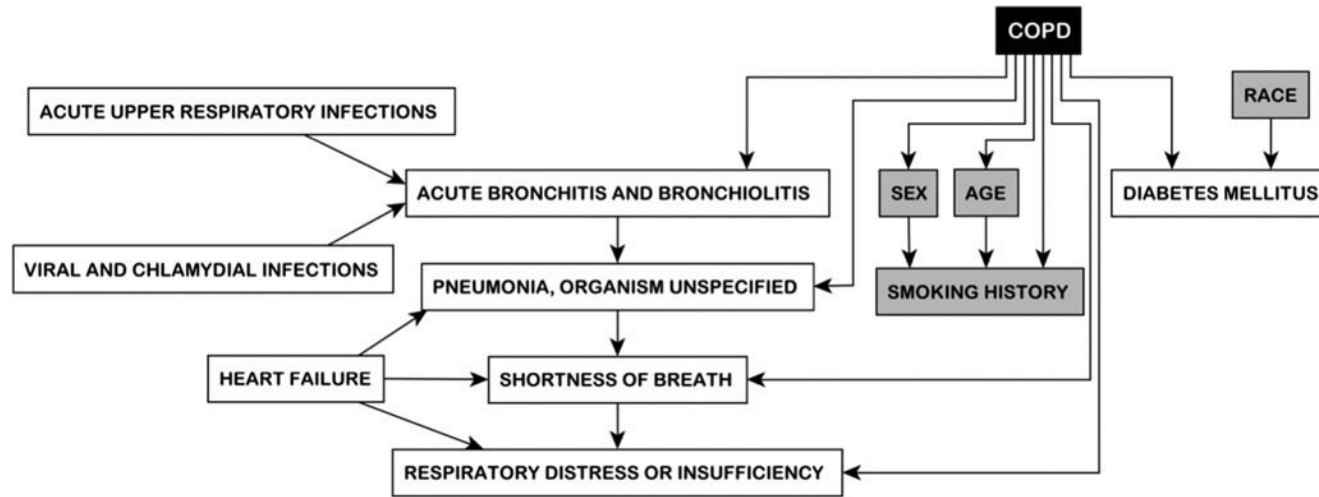





|                              |     |     |     |     |     |     |     |     |     |     |     |    |    |    |    |    |    |    |    |
|------------------------------|-----|-----|-----|-----|-----|-----|-----|-----|-----|-----|-----|----|----|----|----|----|----|----|----|
| FEV <sub>1</sub> % Predicted | 144 | 140 | 136 | 131 | 127 | 123 | 119 | 114 | 110 | 106 | 102 | 98 | 93 | 89 | 85 | 81 | 76 | 72 | 68 |
|------------------------------|-----|-----|-----|-----|-----|-----|-----|-----|-----|-----|-----|----|----|----|----|----|----|----|----|

|        |             |
|--------|-------------|
| Total  | Probability |
| Points |             |

|                            |     |          |
|----------------------------|-----|----------|
| Calculation of Probability | <19 | Low Risk |
|----------------------------|-----|----------|

|           |    |     |
|-----------|----|-----|
| _____ Age | 19 | .01 |
|-----------|----|-----|

|                        |    |     |
|------------------------|----|-----|
| + _____ Cigarettes/Day | 20 | .02 |
|------------------------|----|-----|

|                                   |    |     |
|-----------------------------------|----|-----|
| + _____ Change in Cigarettes/ Day | 21 | .03 |
|-----------------------------------|----|-----|

|                                      |    |     |
|--------------------------------------|----|-----|
| + _____ FEV <sub>1</sub> % Predicted | 22 | .04 |
|--------------------------------------|----|-----|

|                                    |    |     |
|------------------------------------|----|-----|
| = _____ Total Points → Probability | 23 | .06 |
|------------------------------------|----|-----|

|  |    |     |
|--|----|-----|
|  | 24 | .10 |
|--|----|-----|

|  |    |     |
|--|----|-----|
|  | 25 | .14 |
|--|----|-----|

|  |    |     |
|--|----|-----|
|  | 26 | .21 |
|--|----|-----|

|  |     |           |
|--|-----|-----------|
|  | ≥27 | High risk |
|--|-----|-----------|

|  |  |
|--|--|
|  |  |
|--|--|

**Table S7: Definitions of COPD in the selected prediction models**

| Reference                          | Definition of COPD                                                                                                                                                                                                                                                                                                     | Incidence of COPD reported in derivation cohort |
|------------------------------------|------------------------------------------------------------------------------------------------------------------------------------------------------------------------------------------------------------------------------------------------------------------------------------------------------------------------|-------------------------------------------------|
| Guo et al., 2015 <sup>21</sup>     | COPD was diagnosed according to the criteria established by the National Heart, Lung and Blood Institute/World Health Organization Global Initiative for COPD (GOLD): post BD FEV1/FVC ratio, 0.70 cut-off.                                                                                                            | Case-control study                              |
| Kotz et al., 2014 <sup>22</sup>    | The definition of COPD was based on codes from the Read Clinical Classification System, which was produced for clinicians in primary care and is used by the majority of primary care electronic patient record systems (read codes H3, H31 and below (excluding H3101, H31y0, H3122), H32 and below, and H36 to H3z). | 5.53 per 1,000 patient-years (5.46-5.60)        |
| Himes et al., 2009 <sup>23</sup>   | Cases are those subjects who had COPD, determined by having a value of “1” in International Classification of Diseases, Ninth Revision (ICD-9) codes corresponding to at least one of the following: “Chronic Bronchitis,” “Emphysema,” or “Chronic Airways Obstruction, not otherwise specified.”                     | COPD 9.02% (843/9349)                           |
| Higgins et al., 1982 <sup>24</sup> | COPD was defined as obstructive airways disease manifested by a FEV1 less than 65% of the predicted value in combination with an FEV1/FVC ratio less than 80%.                                                                                                                                                         | Males 65/1225 – 5.3%                            |

|  |                                                                                                  |                           |
|--|--------------------------------------------------------------------------------------------------|---------------------------|
|  | Values of FEV1 in the range of 65 to 69% of predicted were considered to be borderline abnormal. | Females 43/1405 –<br>3.1% |
|--|--------------------------------------------------------------------------------------------------|---------------------------|

## References

15. Moons KG, de Groot JA, Bouwmeester W, et al. Critical appraisal and data extraction for systematic reviews of prediction modelling studies: the CHARMS checklist. *PLoS Med.* 2014 11(10):e1001744.
16. Smit HA, Pinart M, Antó JM, et al. Childhood asthma prediction models: a systematic review. *Lancet Respir Med.* . 2015;3(12):973-984.
21. Guo YI, Qian Y, Gong YI, et al. A predictive model for the development of chronic obstructive pulmonary disease. *Biomed Rep* 2015;3(6):853-63.
22. Kotz D, Simpson CR, Viechtbauer W, et al. Development and validation of a model to predict the 10-year risk of general practitioner-recorded COPD. *NPJ Prim Care Respir Med* 2014;24:14011.
23. Himes BE, Dai Y, Kohane IS, et al. Prediction of chronic obstructive pulmonary disease (COPD) in asthma patients using electronic medical records. *J Am Med Inform Assoc* 2009;16(3):371-79
24. Higgins MW, Jacob B, Keller, Mark Becker, et al. An Index of Risk for Obstructive Airways Disease. *Am Rev Respir Dis* 1982;125(2):144-51.
